# Supplementary material for: Recapitulation of pathophysiological features of AD in SARS-CoV-2-infected subjects
Source: eLife. 2023 Jul 7;12:e86333. doi: 10.7554/eLife.86333 (PMC10361716; doi:10.7554/eLife.86333)
Supplement: Source data 1. [file elife-86333-data1.xlsx]

## Sheet: Supplemental Data 1
Source data 1: Gene regulation within the cortical BA9
	AD vs. control		SARS-CoV-2 vs. control		AD+SARS-CoV-2 vs. control
Gene	Expr. Log Ratio	Expr. p-value	Expr. Log Ratio	Expr. p-value	Expr. Log Ratio	Expr. p-value
ABHD17C	-0.175	0.0203	-0.179	0.0151	-0.348	0.000897
ABT1	-0.278	0.0445	-0.293	0.0265	-0.564	0.00798
ACAN	0.593	0.00757	0.562	0.0125	1.14	0.00122
ACKR4	-0.25	0.0185	-0.234	0.0268	-0.482	0.0263
ACSS2	0.359	0.00291	0.331	0.00399	0.708	2.36e-05
ACTL6A	0.377	0.00118	0.302	0.00848	0.707	0.00155
ACTR2	-0.178	0.0287	-0.272	0.000939	-0.441	0.000376
ACTR3B	-0.191	0.0285	-0.265	0.00229	-0.444	0.000722
ADAM28	0.478	0.0244	0.703	0.000854	1.195	0.00315
ADAT2	-0.315	0.0263	-0.403	0.00427	-0.706	0.0024
ADAT3	0.557	0.00131	0.405	0.0192	0.953	0.000938
ADIPOR2	0.357	0.0229	0.414	0.00694	0.776	0.00233
ADRB2	0.359	0.045	0.369	0.0441	0.783	0.0024
AGO2	0.198	0.00631	0.158	0.029	0.367	0.00123
AHNAK	0.329	0.0381	0.464	0.0033	0.792	0.000158
AKAP3	0.599	0.00873	0.878	0.000113	1.566	6.41e-06
AKNA	0.237	0.0391	0.243	0.0364	0.498	0.000938
ALKAL2	0.617	0.0033	0.432	0.0494	1.114	0.000535
ANAPC16	0.253	0.0366	0.364	0.00261	0.632	0.00148
ANKRD1	-0.922	0.0222	-0.822	0.0412	-2.112	0.00192
ANKRD20A4P (includes others)	-0.677	0.0304	-0.449	0.0446	-0.924	0.0304
ANKZF1	0.261	0.0371	0.331	0.00794	0.601	0.0021
ANLN	0.66	0.0335	1.046	0.00044	1.658	0.00145
ANO10	-0.122	0.0207	-0.157	0.0024	-0.27	0.00176
AP4B1	-0.291	0.00537	-0.211	0.043	-0.5	0.00393
APOD	0.353	0.0413	0.378	0.0274	0.693	0.0252
APOO	-0.135	0.0288	-0.221	0.000393	-0.344	0.00315
ARAP1	0.372	6.89e-05	0.44	2.65e-06	0.827	2.37e-06
ARAP1-AS2	0.315	0.0198	0.594	1.03e-05	0.935	0.00013
ARF3	-0.349	0.00496	-0.295	0.0208	-0.633	0.000156
ARHGAP15	0.333	0.0454	0.51	0.00202	0.852	0.000211
ARHGAP17	0.339	3.2e-05	0.266	0.000642	0.613	1.8e-06
ARHGAP21	0.224	0.016	0.202	0.0235	0.437	0.00426
ARHGAP36	-1.064	0.0166	-1.129	0.0108	-2.01	7.57e-05
ARHGAP45	0.408	0.0151	0.615	0.000253	1.037	3.31e-06
ARL1	-0.224	0.00972	-0.263	0.002	-0.477	0.000223
ARL6	-0.279	0.0238	-0.319	0.012	-0.583	0.00216
ARL6IP1	-0.236	0.0254	-0.284	0.00801	-0.52	0.000836
ARMC8	0.209	0.00277	0.2	0.00092	0.417	0.000242
ARPC1B	0.356	0.0458	0.441	0.0139	0.822	0.000305
ARRDC2	0.559	0.00475	0.395	0.0468	0.907	0.00475
ARSG	-0.493	0.00419	-0.555	0.0012	-1.01	1.35e-05
ATAD1	-0.151	0.00799	-0.227	6.19e-05	-0.369	7.89e-05
ATF7	0.236	0.03	0.265	0.0139	0.511	0.00559
ATF7-NPFF	0.237	0.0295	0.272	0.0119	0.518	0.00501
ATG4C	0.362	0.0462	0.42	0.0164	0.795	0.00437
ATOH8	0.548	0.0108	0.54	0.0121	1.025	0.000987
ATP11A	0.249	0.0281	0.413	0.000259	0.675	0.000136
ATP2B1-AS1	-0.563	0.00152	-0.47	0.01	-0.995	0.000112
ATP6AP1	-0.242	0.0304	-0.263	0.0208	-0.495	0.0136
ATP6AP2	-0.243	0.0128	-0.35	0.000438	-0.589	4.38e-05
ATP6V0E2-AS1	-0.199	0.0171	-0.219	0.00795	-0.401	0.0001
ATP6V1E1	-0.264	0.000908	-0.238	0.00337	-0.49	0.000777
ATRN	-0.184	0.00106	-0.153	0.00912	-0.326	0.00274
AUNIP	-0.203	0.0265	-0.189	0.0428	-0.378	0.00323
AZGP1	0.923	0.0256	0.947	0.0221	1.797	0.00865
B3GALNT1	-0.398	0.000932	-0.285	0.0186	-0.674	0.000134
B3GAT1-DT	-0.5	0.00691	-0.553	0.00288	-0.939	0.00334
B4GALT6	-0.325	0.0269	-0.371	0.0122	-0.699	0.00172
BABAM2	-0.192	0.000246	-0.161	0.00279	-0.341	0.000529
BAHCC1	0.228	0.0147	0.395	3.03e-05	0.628	0.000476
BANP	0.416	0.0247	0.384	0.0379	0.871	0.00137
BARD1	0.556	0.00105	0.337	0.0485	0.921	2.98e-06
BEND6	-0.224	0.0466	-0.31	0.00593	-0.523	4.72e-08
BEX4	-0.278	0.00287	-0.292	0.00217	-0.564	0.000169
BEX5	-0.467	0.0394	-0.704	0.00155	-1.117	0.00088
BICRA	0.121	0.0311	0.236	2.4e-05	0.367	0.000774
BMP1	0.318	0.0205	0.32	0.0195	0.658	0.00655
BOK	0.524	0.017	0.926	2.33e-05	1.463	0.000552
BPHL	-0.314	0.0344	-0.292	0.0488	-0.57	0.0188
BRD9	0.181	0.0423	0.257	0.00425	0.463	0.0169
BRF1	0.19	0.00102	0.188	0.00113	0.388	4.98e-05
BSCL2	-0.341	0.0317	-0.374	0.0193	-0.693	0.000507
BTC	-0.377	0.0422	-0.622	0.000709	-0.97	2.28e-05
C1QTNF2	-0.527	0.00226	-0.401	0.0224	-0.881	0.000106
CA2	0.641	0.00206	0.406	0.0316	1.058	0.00147
CAPN15	0.313	0.0214	0.352	0.011	0.667	0.00584
CARD9	0.716	0.00178	0.494	0.028	1.222	1.48e-05
CARHSP1	0.279	0.0015	0.316	0.000325	0.599	0.000217
CASC3	0.188	0.0106	0.255	0.000647	0.453	0.000103
CASP2	0.183	0.00683	0.143	0.0261	0.339	0.000541
CCDC113	-0.324	0.0336	-0.322	0.0389	-0.638	0.000358
CCDC32	-0.189	0.0171	-0.312	7.58e-05	-0.491	0.00043
CCPG1	-0.209	0.00106	-0.168	0.00731	-0.358	0.00221
CD226	-0.291	0.0284	-0.281	0.0358	-0.553	0.00066
CD28	-1.137	0.0491	-2.453	0.000162	-3.293	0.00168
CD86	0.655	0.00503	0.745	0.00156	1.334	0.000995
CDC5L	-0.134	0.00898	-0.228	1.9e-05	-0.348	1.72e-05
CDK19	0.28	0.0451	0.359	0.00746	0.65	0.00266
CDK5RAP2	0.248	0.000968	0.18	0.0161	0.436	0.00188
CDK6-AS1	-0.551	0.0274	-0.608	0.0151	-1.135	0.00545
CEACAM8	-0.587	0.00767	-0.561	0.0108	-1.201	0.00181
CEACAMP5	-0.54	0.00211	-0.518	0.00263	-1.039	0.000549
CEP104	0.19	0.000226	0.165	0.00112	0.361	0.000171
CEP152	0.428	0.00312	0.298	0.04	0.738	0.00235
CEP192-DT	-0.269	0.0142	-0.339	0.00246	-0.591	0.000124
CEP295NL	0.382	0.00689	0.375	0.009	0.761	7.48e-05
CEP43	-0.257	0.00144	-0.274	0.000906	-0.525	0.000108
CEP68	-0.152	0.00854	-0.135	0.0183	-0.274	0.00289
CERNA2	1.456	0.00377	1.161	0.0156	3.295	4.97e-05
CFL1P1	-0.245	0.0406	-0.343	0.00415	-0.582	0.00227
CHD7	0.359	0.028	0.429	0.0088	0.796	0.00455
CHDH	0.5	0.000583	0.398	0.00687	0.92	7.72e-06
CHEK2	0.573	0.000795	0.43	0.0113	1.021	0.000242
CHFR	0.131	0.0251	0.147	0.0126	0.288	0.00242
CHRM5	0.849	0.0213	1.027	0.00482	1.785	0.000595
CHRNA7	-0.677	0.0341	-1.313	3.42e-05	-1.897	7.58e-05
CHST3	0.571	0.0162	0.675	0.00436	1.244	0.000125
CLASRP	0.375	2.57e-05	0.341	0.000216	0.727	5.05e-11
CLCN2	0.285	0.012	0.225	0.0464	0.524	0.00144
CLCN7	0.241	0.0208	0.204	0.0488	0.453	0.00521
CLDN15	0.522	0.00112	0.741	4.41e-06	1.284	1.69e-05
CLIP2	0.282	0.00125	0.309	0.000712	0.601	2.48e-05
CLK1	0.365	0.000243	0.286	0.00403	0.669	0.000184
CLMN	0.618	0.00678	0.584	0.0093	1.206	0.00122
CMTM2	-0.572	0.00614	-0.622	0.00225	-1.154	0.00062
COA7	-0.322	0.00694	-0.325	0.00738	-0.634	0.00109
COPG1	-0.179	0.04	-0.224	0.0118	-0.387	0.0025
COPS7A	-0.377	4.14e-06	-0.313	0.000207	-0.677	4.04e-07
COPS8	-0.217	0.0118	-0.236	0.00821	-0.444	0.00116
COX7B	-0.315	0.00234	-0.337	0.00118	-0.636	0.000254
CPM	0.509	0.00979	0.4	0.0424	0.891	0.00813
CPQ	0.287	0.0083	0.334	0.00171	0.631	0.000836
CPT1B	0.476	0.00117	0.347	0.018	0.826	0.000505
CPZ	-0.655	0.0279	-0.703	0.0184	-1.383	0.00383
CSRNP2	-0.153	0.0276	-0.177	0.0111	-0.316	5.21e-05
CSRP1	0.503	0.00201	0.367	0.0241	0.878	4.6e-05
CTBP2	0.337	9.05e-05	0.252	0.00339	0.601	5.79e-06
CTDSP2	0.191	0.0174	0.357	9.96e-06	0.558	0.00046
CTDSPL2	0.126	0.0087	0.139	0.00157	0.276	0.00211
CTTN	0.212	0.00322	0.192	0.00793	0.417	8.52e-05
CUL2	-0.101	0.0463	-0.111	0.0382	-0.202	0.0174
DAZAP1	0.209	0.0114	0.325	8.25e-05	0.547	4.22e-06
DCAF4	-0.3	0.00447	-0.321	0.00198	-0.614	0.00022
DDB2	0.374	0.0441	0.385	0.0394	0.789	0.000724
DDX19A-DT	0.208	0.0246	0.234	0.0111	0.457	0.00238
DDX39A	0.309	0.0133	0.277	0.0263	0.594	0.0011
DEK	0.265	0.00178	0.22	0.00919	0.499	0.00085
DIO1	0.454	0.00394	0.431	0.00634	0.929	9.34e-05
DIP2C	0.277	0.00043	0.271	0.000398	0.558	2.88e-05
DIXDC1	0.267	0.0115	0.212	0.0363	0.493	0.00426
DLAT	-0.103	0.0492	-0.151	0.00419	-0.245	0.00465
DLD	-0.142	0.0211	-0.176	0.00427	-0.308	0.00349
DLX1	-0.58	0.0269	-0.661	0.0114	-1.205	0.00036
DNAAF4-CCPG1	-0.218	0.000315	-0.175	0.00356	-0.374	0.00033
DNAJA2	-0.191	0.034	-0.274	0.00345	-0.459	0.00301
DNAJB14	-0.145	0.0438	-0.161	0.0295	-0.298	0.00252
DNAJC18	-0.216	0.0028	-0.18	0.0124	-0.385	0.00185
DNAJC24	-0.243	0.0129	-0.193	0.0366	-0.424	0.00451
DNM2	0.231	0.00149	0.26	0.000473	0.502	2.68e-06
DOCK11	0.376	0.00494	0.272	0.0416	0.647	1.07e-05
DOT1L	0.353	0.00203	0.258	0.0245	0.62	0.000126
DPY19L2P3	-0.264	0.00856	-0.274	0.00629	-0.526	1.37e-05
DTWD2	-0.245	0.00689	-0.322	0.000405	-0.545	0.00235
DUSP22	0.189	0.0299	0.201	0.0214	0.4	0.00239
DVL2	0.251	0.00079	0.197	0.012	0.458	0.000753
DYNC2LI1	-0.288	0.000507	-0.27	0.00133	-0.53	0.000838
E2F3	-0.332	0.00647	-0.319	0.0087	-0.636	0.000165
EBF4	0.219	0.0442	0.244	0.0276	0.485	0.0134
EBLN2	0.386	0.0403	0.566	0.00197	0.984	0.000632
EBLN3P	-0.167	0.00361	-0.181	0.00299	-0.333	0.000353
EDA2R	0.556	0.0282	0.505	0.0395	1.148	0.000343
EHBP1L1	0.24	0.0419	0.28	0.0222	0.529	0.00189
EHMT1	0.125	0.0205	0.194	0.000319	0.332	0.000997
EIF3M	-0.133	0.0431	-0.192	0.00362	-0.314	0.00649
EIF4E3	-0.179	0.0179	-0.161	0.0329	-0.331	0.00636
ELF1	0.408	0.00244	0.373	0.00558	0.795	0.000595
ELF2	0.195	0.0322	0.211	0.0202	0.422	0.000834
ELMOD3	0.25	0.00103	0.266	0.000458	0.525	1.84e-05
ELOA-AS1	0.368	3.13e-05	0.203	0.0236	0.596	7.27e-05
EML2	0.244	0.0118	0.206	0.0338	0.465	0.00431
ENPP5	-0.234	0.0473	-0.349	0.00325	-0.58	0.00348
EPHA5-AS1	-0.479	0.0213	-0.478	0.0219	-0.889	0.000636
ERBIN	0.59	0.00112	0.446	0.0126	1.039	0.000105
ERFE	-0.555	0.0162	-0.562	0.0131	-1.055	0.00318
ERI3	0.139	0.0345	0.146	0.0245	0.295	0.0122
ERICH3-AS1	-0.613	0.0128	-0.525	0.037	-1.081	1.66e-05
ERICH6B	-0.244	0.0421	-0.238	0.0478	-0.462	0.0156
ETV5-AS1	-0.455	0.00893	-0.349	0.0446	-0.776	0.00387
EVI5L	0.174	0.037	0.259	0.00332	0.433	0.0105
EXT1	-0.222	0.0265	-0.229	0.0216	-0.436	1.16e-05
FAM133B	0.251	0.00642	0.224	0.0156	0.495	0.00402
FAM170B-AS1	1.324	0.000275	0.992	0.00638	2.291	0.000291
FAM174A	-0.202	0.0379	-0.225	0.0202	-0.416	0.00252
FAM229A	0.493	0.00379	0.611	0.000316	1.066	9.49e-05
FAM234B	-0.374	0.0187	-0.346	0.0314	-0.701	0.00058
FAM3D-AS1	0.697	0.00212	0.562	0.0134	1.255	0.000463
FAM53B	0.33	0.00356	0.387	0.000621	0.724	0.000237
FAM53B-AS1	0.293	0.0383	0.37	0.00788	0.653	0.00354
FANCB	0.547	0.000158	0.427	0.00235	0.964	0.000117
FANCE	0.306	0.0299	0.349	0.0132	0.659	0.0055
FASTKD2	-0.189	0.024	-0.22	0.00786	-0.397	0.000584
FBRSL1	0.255	0.0227	0.29	0.00891	0.558	0.00134
FBXL21P	-1.086	0.00802	-1.078	0.00915	-1.863	0.00121
FCHO1	0.439	0.00426	0.455	0.0031	0.906	0.000684
FFAR4	-0.471	0.0343	-0.531	0.0163	-0.963	0.000248
FGD3	0.456	0.00495	0.445	0.00678	0.943	0.00036
FLACC1	-0.365	0.0164	-0.428	0.00505	-0.77	0.00162
FLII	0.296	0.000347	0.269	0.00111	0.573	1.93e-05
FLJ40194	0.525	0.00463	0.479	0.00892	0.997	0.000517
FNDC5	-0.394	0.0005	-0.239	0.043	-0.602	0.00013
FOXG1-AS1	-0.279	0.0408	-0.274	0.0447	-0.536	0.00029
FOXO4	0.406	0.0311	0.561	0.00323	0.957	0.00147
FOXP4	0.213	0.0204	0.243	0.00904	0.475	0.0103
FREM3	-0.441	0.0173	-0.831	6.56e-06	-1.255	9.73e-08
FRG1JP	0.705	0.0357	1.133	0.000755	1.906	8.82e-05
FRMD6	-0.321	0.0131	-0.391	0.0029	-0.693	8.71e-07
FRMD6-AS2	-0.618	0.0256	-1.001	0.000225	-1.645	2.17e-05
GALNT11	-0.341	3.78e-05	-0.265	0.00112	-0.595	1.79e-07
GAP43	-0.414	0.0269	-0.424	0.0233	-0.832	3.32e-08
GAS6	0.203	0.012	0.186	0.0208	0.4	0.000765
GAS6-AS1	0.267	0.0127	0.211	0.0486	0.497	0.00305
GIPR	0.802	0.00769	0.623	0.0373	1.461	0.00133
GNG3	-0.584	0.0139	-0.519	0.0299	-1.067	2.96e-05
GNPTAB	-0.172	0.0128	-0.137	0.0476	-0.296	0.00644
GNRH1	0.645	0.00553	0.956	2.12e-05	1.586	1.74e-05
GOLGA3	0.157	0.0232	0.167	0.0163	0.334	0.00888
GOLT1B	-0.219	0.0397	-0.39	0.000251	-0.59	0.00175
GOPC	-0.161	0.00304	-0.122	0.0211	-0.273	0.00164
GPC6	-0.596	0.00308	-0.441	0.0302	-1	0.000203
GPIHBP1	0.929	0.0212	0.805	0.0432	1.603	0.00727
GPR108	0.265	0.0327	0.328	0.00825	0.577	0.00365
GPR141	0.668	0.0452	0.779	0.0183	1.508	0.000888
GPRASP1	-0.323	0.0393	-0.359	0.0221	-0.664	0.00144
GPRC5B	0.377	0.00865	0.452	0.00165	0.836	0.000527
GPSM1	0.265	0.00818	0.191	0.0457	0.461	0.00251
GTF2A1	-0.173	0.00311	-0.22	0.000195	-0.387	0.000682
H1-9P	0.63	0.0227	0.841	0.00243	1.522	0.00064
H2AZ1-DT	-0.218	0.0359	-0.202	0.0484	-0.415	0.0101
HAPLN1	-0.688	0.0253	-0.628	0.0441	-1.29	0.00305
HAPLN2	0.682	0.036	0.739	0.0215	1.427	0.00106
HAR1A	-0.582	0.0412	-0.633	0.0255	-1.246	0.00274
HAUS5	0.341	0.0189	0.367	0.0126	0.74	0.00475
HBP1	0.208	0.00654	0.2	0.00881	0.418	0.00126
HCLS1	0.642	0.00239	0.574	0.0064	1.304	4.33e-05
HDAC4	0.196	0.000784	0.279	1.48e-06	0.49	3.12e-07
HDGF	0.216	0.00825	0.178	0.0271	0.401	0.00366
HEBP2	0.221	0.0442	0.269	0.0146	0.501	0.0014
HEXD	0.524	1.87e-05	0.298	0.0132	0.829	0.000124
HIGD1C	0.499	0.0347	0.493	0.0376	1.011	0.00312
HIP1	0.359	0.0372	0.604	0.00046	0.967	0.0015
HMBOX1	0.194	0.00784	0.156	0.0305	0.362	0.0032
HMG20A	-0.154	0.0209	-0.15	0.0179	-0.291	0.0024
HMG20B	0.459	0.00339	0.406	0.00956	0.876	0.00144
HNRNPA2B1	0.212	0.000227	0.14	0.0149	0.366	0.000172
HNRNPF	0.378	0.000577	0.218	0.0487	0.605	7.67e-05
HNRNPH1	0.169	0.00573	0.169	0.00239	0.35	0.00056
HNRNPUL2-BSCL2	-0.257	0.0214	-0.255	0.0228	-0.492	0.00139
HPN	0.691	0.0405	0.806	0.0164	1.53	0.00029
HTATIP2	0.519	0.00254	0.551	0.00109	1.112	6.79e-05
ICA1	-0.411	0.00932	-0.363	0.0217	-0.726	0.000722
ICA1L	-0.253	0.00608	-0.197	0.0335	-0.444	5.33e-05
IKZF2	0.415	0.0108	0.373	0.0193	0.799	0.00178
IL10RA	0.579	0.00778	0.459	0.0297	1.019	0.000337
INPPL1	0.289	0.0346	0.34	0.0123	0.625	0.000668
INSM1	-0.539	0.0218	-0.454	0.0462	-0.99	0.00869
INSR	0.234	0.00123	0.264	0.000301	0.508	9.17e-05
IP6K3	1.155	9.24e-05	0.937	0.00125	2.099	1.16e-05
IRAK2	0.473	0.0262	0.62	0.00359	1.115	4.56e-05
IRF2	0.176	0.0251	0.228	0.00377	0.417	0.00093
IRF8	0.688	0.0117	0.777	0.00361	1.516	0.000271
ITGA11	0.555	0.00418	0.418	0.0267	0.972	0.000106
ITGB8	0.305	0.0295	0.33	0.0166	0.644	0.006
ITGB8-AS1	0.382	0.0284	0.47	0.00701	0.842	0.00235
ITPKB	0.528	0.00478	0.445	0.0172	0.965	4.29e-05
ITPKB-IT1	0.536	0.00631	0.397	0.0432	0.934	0.00013
ITPRIP-AS1	0.72	0.0258	0.644	0.0446	1.862	0.00214
IWS1	0.246	0.00406	0.268	0.00159	0.526	0.00174
JAKMIP3	0.351	0.0171	0.421	0.00426	0.791	0.000801
KAT6A	0.17	0.00273	0.114	0.0443	0.297	0.0026
KCNJ11	-0.277	0.0335	-0.262	0.044	-0.528	0.00102
KCNMB4	0.486	0.0335	0.446	0.0483	0.939	0.00121
KCNV2	-0.291	0.0248	-0.47	0.000329	-0.726	0.0046
KDM4B	0.207	0.0286	0.242	0.0128	0.46	0.000312
KDM6A	0.255	0.00401	0.207	0.0138	0.469	0.0262
KIAA1755	0.467	0.0341	0.624	0.00453	1.079	0.00263
KIAA1958	0.303	0.00225	0.245	0.0107	0.56	0.00203
KIF12	-0.492	0.0438	-0.879	0.000171	-1.349	3.54e-05
KIF13B	0.369	0.0214	0.475	0.00219	0.853	0.000639
KIF1C	0.331	0.014	0.497	0.000299	0.836	0.00247
KIF3B	-0.192	0.014	-0.236	0.00246	-0.415	0.000408
KLF15	0.596	0.000949	0.694	0.000135	1.295	3.78e-05
KLF8	-0.353	0.00341	-0.311	0.0096	-0.647	0.000807
KLHDC10	-0.224	6.12e-05	-0.131	0.0156	-0.345	6.69e-05
KLHL21	0.279	0.0476	0.313	0.0258	0.62	0.00558
KLHL42	-0.196	0.00408	-0.255	0.000194	-0.441	1.07e-05
KLHL6-AS1	1.149	0.035	1.189	0.0267	3.183	0.00727
KLK5	-1.469	0.00607	-1.222	0.024	-2.375	0.00107
KLRC4-KLRK1/KLRK1	0.517	0.0395	0.538	0.00463	1.011	0.00271
KMT2C	0.124	0.013	0.107	0.0301	0.243	0.00306
L2HGDH	-0.211	0.0176	-0.224	0.0113	-0.428	0.0086
LBX2	0.921	0.0036	0.734	0.0198	1.638	0.00322
LCLAT1	-0.205	0.0173	-0.245	0.00419	-0.439	0.00187
LETMD1	-0.194	0.0478	-0.212	0.032	-0.389	0.00175
LINC00488	-0.493	0.0362	-0.548	0.0233	-0.988	0.0074
LINC00498	0.77	0.0362	0.756	0.0398	1.677	0.00659
LINC00842	-1.179	0.000449	-0.799	0.0183	-1.919	0.00011
LINC00862	0.582	0.00647	0.655	0.00221	1.31	0.000274
LINC01007	-1.026	0.00802	-0.979	0.0112	-1.987	4.43e-06
LINC01065	-0.693	0.0249	-0.864	0.00572	-1.573	0.000963
LINC01128	-0.18	0.0396	-0.199	0.0231	-0.362	0.00265
LINC01277	-0.524	0.008	-0.442	0.0249	-0.919	0.00236
LINC01338	0.878	0.0209	1.132	0.00228	1.873	0.000469
LINC01561	0.579	0.0193	0.735	0.00294	1.369	0.0022
LINC01736	1.043	0.0303	1.345	0.00526	2.452	0.000736
LINC01844	-0.552	0.0412	-0.764	0.00461	-1.281	0.00044
LINC02320	-0.577	0.00922	-0.812	0.000305	-1.318	0.000858
LINC02516	0.583	0.0362	0.581	0.0362	1.267	0.0139
LINC02733	0.549	0.0435	0.63	0.0217	1.272	0.00412
LINC02774	-0.61	0.00272	-0.643	0.00147	-1.156	6.13e-05
LITAF	0.352	0.0339	0.526	0.00132	0.909	2.99e-05
LLGL2	0.458	0.0262	0.583	0.00441	1.048	0.00216
LMF1-AS1	0.301	0.0086	0.298	0.00948	0.608	0.00141
LNCAROD	0.873	0.00938	1.216	0.000291	2.091	4.09e-05
LNPK	-0.145	0.0156	-0.261	1.48e-05	-0.394	8.34e-05
LRCH4	0.284	0.00803	0.32	0.00307	0.613	0.00107
LRP2	0.703	0.0413	1.064	0.00161	1.767	0.000729
LRP4	0.433	0.0313	0.517	0.0104	0.96	0.0012
LRRC1	0.663	0.000905	0.681	0.000422	1.332	5.6e-05
LRRC69	0.391	0.00102	0.383	0.00107	0.77	0.00206
LRRK2-DT	-0.531	0.0309	-0.501	0.0416	-1.071	0.00656
LRTM2	-0.576	0.0046	-0.409	0.0438	-0.941	0.000337
LUC7L2	-0.332	0.00729	-0.246	0.0485	-0.555	0.00274
LYRM9	-0.658	0.000292	-0.46	0.0109	-1.046	0.00191
LZTS2	0.262	0.0339	0.279	0.0242	0.549	0.00253
MACROH2A2	-0.214	0.00352	-0.192	0.0041	-0.391	0.000227
MAD1L1	0.298	0.00513	0.393	0.000192	0.712	1.28e-05
MAGED4/MAGED4B	1.605	0.017	1.834	0.00285	2.825	0.000335
MAGEH1	-0.279	0.0314	-0.312	0.0189	-0.574	0.00676
MAP1LC3A	-0.202	0.0403	-0.245	0.0118	-0.435	0.00854
MAP2K2	0.164	0.00927	0.127	0.0395	0.299	0.0101
MAP2K7	0.215	0.0288	0.225	0.024	0.438	0.00604
MAP4K3-DT	-0.267	0.0378	-0.301	0.0189	-0.552	0.000124
MAP4K5	0.25	0.0398	0.297	0.0112	0.559	0.0105
MAPK8	-0.15	0.0253	-0.136	0.0315	-0.277	0.00321
MAVS	0.197	0.0463	0.324	0.00111	0.519	0.00301
MBNL1	0.166	0.00824	0.176	0.0048	0.356	0.00261
MCM3AP-AS1	0.156	0.0275	0.168	0.0186	0.333	0.0103
MCM4	-0.279	0.0119	-0.307	0.00607	-0.578	0.00911
MCM7	0.414	0.0101	0.369	0.0244	0.771	0.00683
MCPH1	0.196	0.0298	0.176	0.0498	0.381	0.00202
MDH1B	-0.603	0.00169	-0.596	0.00307	-1.162	5.13e-06
MEAF6	-0.212	0.00734	-0.168	0.0373	-0.372	0.00543
MED13L	0.097	0.00429	0.081	0.0174	0.189	0.00858
MED25	0.231	0.0105	0.183	0.0431	0.423	0.00135
MEG9	-0.551	0.00933	-0.762	0.000301	-1.309	7.95e-06
METAP1D	-0.361	0.00577	-0.299	0.0226	-0.646	0.000884
MFN2	-0.166	0.00482	-0.133	0.0222	-0.285	0.00103
MFSD8	-0.199	0.00954	-0.24	0.00196	-0.431	0.00197
MICALL2	0.302	0.0327	0.308	0.0268	0.616	0.00362
MID1IP1	0.597	0.000113	0.359	0.0202	0.974	0.000773
MIPEP	-0.217	0.0438	-0.232	0.0278	-0.449	0.00562
mir-1249	0.675	0.00726	0.577	0.0204	1.233	0.00188
MIRLET7BHG	0.189	0.039	0.353	0.000146	0.55	0.00333
MLKL	0.398	0.0343	0.581	0.00175	1.036	0.000111
MNAT1	-0.22	0.00528	-0.164	0.0398	-0.38	0.00182
MOB1A	0.169	0.0303	0.179	0.0215	0.36	0.000548
MOB3A	0.241	0.00494	0.233	0.00919	0.478	0.00321
MOG	2.348	0.00356	2.88	0.000518	5.592	5.62e-06
MPST	0.376	0.0362	0.629	0.000486	1.003	0.00484
MRPL15	-0.18	0.0214	-0.177	0.0238	-0.348	0.00975
MRPL33	-0.144	0.0483	-0.224	0.00217	-0.354	0.00919
MRPS30-DT	-0.318	0.0143	-0.281	0.03	-0.583	0.000573
MS4A14	0.644	0.0221	0.747	0.00762	1.406	1.96e-05
MS4A6E	0.642	0.0144	0.558	0.0325	1.201	0.000543
MS4A7	0.641	0.0146	0.615	0.0188	1.254	0.000247
MS4A8	-0.847	0.0109	-0.918	0.00603	-1.658	0.00351
MT1E	0.552	0.00266	0.634	0.000504	1.193	5.77e-06
MT1F	0.593	0.00761	0.982	9.71e-06	1.57	1.45e-09
MT1G	0.642	0.0124	0.798	0.0013	1.476	1.68e-05
MT1JP	2.037	0.00469	1.934	0.00624	4.59	0.000566
MT1L	0.896	0.00566	0.786	0.0155	1.799	0.000441
MTMR9	-0.211	0.000346	-0.238	0.000219	-0.438	4.79e-07
MTX3	-0.217	0.000747	-0.158	0.0177	-0.358	0.000251
MXRA8	-0.388	0.00604	-0.353	0.0102	-0.725	0.00139
MYLK-AS1	0.283	0.0275	0.271	0.0336	0.551	0.00839
MYO9B	0.312	0.0141	0.335	0.00854	0.652	0.000355
NACC2	0.3	0.00875	0.572	7.67e-07	0.863	8.03e-05
NAP1L5	-0.354	0.0378	-0.565	0.000846	-0.914	5.74e-05
NBEAL2	0.202	0.0445	0.204	0.0487	0.416	0.0175
NBPF10 (includes others)	0.307	0.0316	-0.321	0.000967	-0.378	0.0109
NCLP1	0.426	0.04	0.543	0.0085	1.001	0.00136
NCMAP	1.352	0.000144	1.092	0.00239	2.5	5.48e-06
NCOR2	0.17	0.0349	0.21	0.0124	0.387	0.00189
NCR3LG1	-0.26	0.0375	-0.351	0.00491	-0.602	0.000322
NDFIP1	-0.235	0.013	-0.249	0.00912	-0.482	0.00145
NDRG1	0.449	0.0116	0.559	0.00171	1.011	0.000278
NDUFA5	-0.263	0.00595	-0.309	0.000821	-0.568	7.61e-05
NDUFAF6	0.226	0.0132	0.272	0.00294	0.518	0.00312
NDUFB5	-0.275	0.00413	-0.261	0.00803	-0.525	0.00146
NEAT1	0.86	3.87e-05	0.599	0.00408	1.478	1.83e-07
NFASC	0.253	0.0186	0.264	0.0124	0.525	0.00584
NFATC1	0.662	0.00116	0.731	0.00041	1.44	3.86e-06
NFATC2	0.772	1.75e-06	0.444	0.00627	1.248	4.85e-12
NGFR	1.116	0.0242	1.145	0.0207	2.156	0.00179
NKX6-2	0.672	0.00203	1.08	7.01e-07	1.75	1.16e-05
NMD3	-0.277	0.00906	-0.283	0.00826	-0.546	0.000883
NMUR2	0.872	0.0295	0.9	0.0224	1.751	0.00314
NORAD	-0.192	0.000886	-0.185	0.00178	-0.367	5.71e-05
NPRL3	0.157	0.0278	0.178	0.0126	0.349	0.0182
NPY6R	0.386	0.0314	0.446	0.00988	0.86	0.00219
NRIP2	0.232	0.046	0.312	0.00559	0.554	0.00499
NRSN2	-0.369	0.00193	-0.246	0.0389	-0.591	0.00126
NSG1	-0.335	0.0181	-0.377	0.00794	-0.7	0.00013
NUDT21	-0.167	0.0408	-0.267	0.000962	-0.429	0.000914
NUP42	-0.257	0.0179	-0.24	0.0283	-0.482	0.0017
OLMALINC	0.585	0.000981	0.779	4.24e-06	1.365	6.89e-08
OPTC	0.852	0.0189	0.863	0.02	1.507	0.0027
OR10G4	-2.088	0.00795	-1.725	0.0222	-4.435	0.000748
OR2AG2	-0.536	0.0384	-0.575	0.0273	-1.027	0.00178
OR7A5	1.916	0.000777	1.554	0.00477	3.438	0.000236
OR7C1	1.425	0.000902	1.092	0.00992	2.721	0.00125
OR7E161P	-0.757	0.0252	-0.757	0.0274	-1.515	0.00252
ORAI2	0.381	0.00213	0.372	0.00265	0.77	1.79e-05
OTUD7B	0.393	0.012	0.388	0.0132	0.789	0.000551
P2RX7	0.283	0.0113	0.385	0.000549	0.678	0.00121
PACRGL	-0.134	0.0074	-0.158	0.00333	-0.277	0.00448
PACS2	0.26	0.00653	0.372	9.29e-05	0.638	7.54e-06
PAK1	-0.369	0.0202	-0.465	0.00378	-0.817	2.68e-05
PAK2	0.248	0.000831	0.176	0.0188	0.437	0.000487
PAK6	-0.394	0.0377	-0.406	0.0275	-0.773	0.000301
PANK2-AS1	0.664	0.00999	0.603	0.018	1.282	0.0022
PANK3	-0.12	0.0042	-0.159	0.000155	-0.268	6.86e-05
PARVG	0.718	5.6e-05	0.423	0.0128	1.163	1.24e-06
PAX6	0.282	0.0135	0.264	0.0182	0.556	2.62e-06
PAXX	0.26	0.0453	0.335	0.0106	0.601	0.017
PCA3	0.486	0.03	0.642	0.00316	1.13	0.00129
PCDH1	-0.237	0.0173	-0.204	0.0404	-0.429	0.00079
PCYOX1L	-0.523	0.00263	-0.539	0.00196	-1.009	3.43e-05
PDE10A	-0.508	0.00014	-0.399	0.00375	-0.899	3.42e-08
PFKFB4	0.22	0.0137	0.292	0.00132	0.527	0.00201
PFN2	-0.297	0.0164	-0.332	0.00865	-0.623	1.51e-05
PGAP4	-0.282	0.0331	-0.307	0.0263	-0.578	9.04e-05
PGLS-DT	0.212	0.0119	0.446	1.54e-07	0.664	0.000229
PGPEP1L	-0.426	0.0195	-0.511	0.00531	-0.94	0.000482
PGRMC1	-0.194	0.0189	-0.266	0.00115	-0.448	0.00056
PGS1	0.177	0.00868	0.27	6.92e-05	0.459	7.13e-07
PHACTR3	0.237	0.00737	0.189	0.0347	0.434	0.00682
PHF19	0.503	0.00277	0.54	0.00134	1.063	1.03e-05
PHF21A	0.216	0.000387	0.123	0.0472	0.35	0.000232
PIAS4	0.323	3.61e-05	0.352	6.27e-06	0.69	4.52e-06
PICALM	0.23	0.01	0.307	0.000316	0.549	0.00067
PIEZO1	0.479	0.00033	0.386	0.00507	0.849	0.000453
PIK3AP1	0.606	0.0419	0.605	0.044	1.243	6.84e-05
PIK3CD	0.197	0.0473	0.244	0.0175	0.439	0.0118
PIPOX	-0.36	0.000524	-0.294	0.00564	-0.639	7.22e-07
PJA2	-0.211	0.0462	-0.265	0.014	-0.476	0.00195
PKN2-AS1	-0.322	0.0243	-0.408	0.00426	-0.717	5.25e-05
PLEKHA3	-0.151	0.0269	-0.191	0.00692	-0.331	0.00318
PLEKHA7	0.401	0.0169	0.358	0.0313	0.762	2.26e-05
PLEKHB1	0.31	0.0185	0.413	0.00134	0.716	0.00108
PLEKHB2	-0.203	0.0171	-0.283	0.000935	-0.475	0.000419
PLIN3	0.735	0.00117	0.605	0.00775	1.365	1.1e-06
PLOD3	0.332	0.0268	0.669	7.68e-06	1.047	0.000656
PLPP4	0.534	0.000905	0.45	0.00843	0.99	0.000358
PLXNB1	0.414	0.00177	0.544	4.3e-05	0.959	1.35e-05
PMS2P4	-0.375	0.0044	-0.275	0.0371	-0.63	0.00131
PNMA3	-0.49	0.025	-0.433	0.048	-0.837	0.00916
PNMA8C	-0.454	0.0111	-0.476	0.00928	-0.929	0.000102
POGK	0.183	0.0249	0.178	0.0289	0.37	0.0253
POLD1	0.558	2.16e-05	0.528	8.94e-05	1.114	2.99e-07
POLR2K	-0.243	0.011	-0.371	0.000143	-0.602	9.32e-05
PPEF1	-0.591	0.00691	-0.572	0.0101	-1.144	0.000429
PPFIBP2	0.46	0.0126	0.559	0.00201	1.019	0.00239
PPIP5K2	-0.137	0.0203	-0.193	0.000669	-0.32	0.00644
PPP1R2	-0.225	0.00877	-0.354	3.62e-05	-0.563	0.000855
PPP1R3B	0.372	0.0455	0.356	0.045	0.753	0.00108
PPP4R2	0.222	0.0109	0.227	0.00888	0.467	0.00581
PPT1	-0.218	0.00112	-0.169	0.0249	-0.379	0.00179
PREX1	0.354	0.0205	0.547	0.000331	0.912	1.18e-05
PRKAR1A	-0.141	0.0417	-0.222	0.00187	-0.353	0.00141
PRKX	0.681	0.00059	0.752	0.00011	1.466	5.57e-09
PROC	0.513	0.0438	0.522	0.04	1.076	0.00984
PRRG1	0.362	0.00255	0.377	0.000923	0.751	0.000354
PSG3	-0.817	0.000751	-0.562	0.0229	-1.317	0.00211
PSMA3	0.2	0.00095	0.155	0.00924	0.365	0.00192
PSMG4	0.366	0.0216	0.39	0.0156	0.77	0.000312
PTP4A2	0.263	0.00885	0.303	0.00176	0.596	0.00722
PTPRC	0.585	0.00125	0.551	0.00289	1.197	9.96e-06
PUM3	-0.252	0.00264	-0.32	0.000177	-0.559	1.54e-05
QDPR	0.536	0.00343	0.683	0.000154	1.217	0.000362
R3HCC1	0.361	0.021	0.343	0.0276	0.706	0.00159
RALGAPA2	0.225	0.00137	0.215	0.00217	0.452	5.96e-05
RALGDS	0.34	0.0368	0.371	0.0248	0.719	0.00104
RASA3	0.197	0.00961	0.168	0.0273	0.377	0.00143
RASSF2	0.384	0.0487	0.532	0.00483	0.914	0.00443
RAVER1	0.173	0.0415	0.18	0.0336	0.355	0.0136
RBFOX2	-0.155	0.0341	-0.203	0.0053	-0.347	0.000592
RBM19	0.168	0.039	0.163	0.046	0.338	0.0221
RELA	0.448	0.000929	0.381	0.00505	0.845	6.72e-05
RENBP	0.502	0.00175	0.751	2.08e-06	1.241	1.85e-05
RESF1	0.214	0.0153	0.199	0.0256	0.427	0.00297
RFTN2	0.396	0.0274	0.617	0.000497	1.02	0.00189
RGCC	0.664	0.00075	0.496	0.0128	1.168	4.79e-05
RGS17	-0.411	8.88e-05	-0.231	0.0281	-0.624	0.000291
RGS18	0.674	0.0153	0.746	0.0074	1.463	0.00105
RHBDF2	0.625	0.00422	0.771	0.000582	1.467	2.92e-08
RHOXF1P3	-0.383	0.0094	-0.438	0.00333	-0.833	0.000212
RIC3	-0.139	0.0259	-0.16	0.00949	-0.289	0.00352
RIN2	0.274	0.0115	0.45	7.86e-06	0.74	4.22e-06
RNF121	-0.124	0.0276	-0.165	0.00339	-0.283	0.000908
RNF144A	0.284	0.0192	0.34	0.00439	0.629	0.000526
RNF166	0.305	0.00673	0.577	4.41e-07	0.898	4.52e-08
RNF187	-0.237	0.0403	-0.256	0.0262	-0.482	0.00179
RNF216	0.173	0.00045	0.118	0.0172	0.305	6.54e-05
RNF216-IT1	0.352	0.000121	0.184	0.0457	0.536	0.000144
RNF34	-0.123	0.00872	-0.146	0.00103	-0.26	0.000622
RNMT	-0.206	0.000874	-0.244	5.39e-05	-0.434	0.000266
RPGRIP1L	-0.349	0.00241	-0.247	0.0374	-0.581	1.49e-05
RPL15	-0.174	0.0177	-0.195	0.00739	-0.36	0.00172
RPS10P7	0.293	0.0343	0.289	0.035	0.602	0.000378
RPS6KA1	0.553	0.00245	0.489	0.00789	1.107	4.55e-06
RUNX1	0.474	0.000259	0.565	1.29e-05	1.044	1.2e-09
RXRA	0.343	0.0128	0.331	0.0167	0.685	0.000285
SAFB	0.206	6.21e-05	0.149	0.00384	0.367	5.23e-05
SASH1	0.246	0.0274	0.348	0.00185	0.607	0.000158
SCAMP2	0.287	0.00794	0.344	0.0013	0.645	3.83e-05
SCMH1	-0.152	0.0163	-0.138	0.0303	-0.279	0.00174
SCOC	-0.275	0.000565	-0.286	0.000623	-0.55	2.8e-06
SDCCAG8	0.416	0.0493	0.556	0.0267	1.019	7.48e-10
SEC22A	-0.163	0.00434	-0.13	0.0145	-0.283	0.000579
SEPTIN8	0.298	0.00511	0.355	0.000871	0.654	0.000691
SERINC1	-0.175	0.0202	-0.177	0.0179	-0.342	0.0113
SEZ6	-0.41	0.00631	-0.373	0.0142	-0.768	9.03e-08
SF3B1	0.094	0.0476	0.093	0.0473	0.197	0.0256
SGCA	0.728	0.00497	0.622	0.0192	1.328	0.00146
SH2D5	-0.42	0.0475	-0.424	0.0446	-0.822	0.00112
SH2D6	1.13	1.65e-05	0.901	0.000464	2.026	2.67e-08
SHKBP1	0.376	0.0184	0.464	0.00366	0.845	0.00225
SHMT1	0.498	0.000617	0.41	0.00474	0.919	6.42e-06
SIPA1	0.426	0.00524	0.608	9.14e-05	1.067	1.1e-08
SIRPB2	0.838	0.00117	0.718	0.00573	1.721	1.92e-05
SLA	0.653	0.0024	0.542	0.0128	1.278	5.99e-06
SLC16A14	-0.46	0.000874	-0.328	0.0173	-0.778	0.000292
SLC16A6	-0.724	0.0182	-0.691	0.0217	-1.384	0.000467
SLC22A23	0.353	0.000543	0.467	2.08e-06	0.828	1.38e-06
SLC2A5	1.106	1.28e-05	0.511	0.0477	1.691	1.75e-07
SLC35B4	-0.208	0.00416	-0.218	0.00631	-0.409	0.000327
SLC38A10	0.226	0.00259	0.237	0.00178	0.469	1.19e-05
SLC39A11	0.616	0.000284	0.51	0.00246	1.126	0.00021
SLC5A11	0.923	0.0138	0.89	0.016	1.784	0.00065
SLC6A9	0.677	0.000504	0.691	0.000301	1.364	1.76e-06
SLC9A9	0.256	0.0347	0.31	0.0104	0.582	0.000669
SMC4	0.441	0.0287	0.73	0.000172	1.172	0.00106
SMG5	0.174	0.013	0.16	0.0208	0.341	0.00601
SMIM10L2B	-0.49	0.0264	-0.473	0.0318	-0.894	0.00034
SMPD4	0.218	0.000171	0.215	0.000256	0.44	3.42e-05
SNORD17	0.247	0.0393	0.311	0.00961	0.584	0.00352
SNRK	-0.157	0.000514	-0.155	0.000811	-0.304	0.000339
SNU13	-0.213	0.0351	-0.268	0.00942	-0.466	0.002
SNX20	0.794	0.0126	0.696	0.035	1.587	0.00124
SOWAHB	-0.578	0.0186	-0.588	0.0166	-1.084	0.00918
SPATA13	0.485	0.0208	0.44	0.0313	0.952	0.000782
SPCS1	-0.228	0.00298	-0.158	0.0415	-0.373	0.00067
SPIN2A/SPIN2B	-0.395	0.037	-0.619	0.00453	-0.823	0.0199
SPN	0.617	0.0457	0.652	0.0343	1.388	0.00776
SPSB1	0.463	0.0213	0.622	0.00177	1.123	1.88e-06
SPTSSB	-0.444	0.0321	-0.485	0.0186	-0.91	0.000837
SRGAP1	0.246	0.00283	0.279	0.00074	0.536	7.36e-06
ST6GALNAC3	0.32	0.0151	0.299	0.0195	0.632	1.69e-05
ST7L	0.148	0.00816	0.132	0.016	0.291	0.000864
STAG2	0.142	0.0292	0.137	0.0269	0.288	0.00622
STARD3	0.336	0.000131	0.278	0.00163	0.623	0.00011
STON1-GTF2A1L	0.771	4.08e-05	0.418	0.0235	1.185	1.29e-06
STPG4	0.267	0.0404	0.288	0.0269	0.566	0.00496
STS	-0.415	0.000207	-0.285	0.0118	-0.669	0.009
STUM	-0.493	0.00241	-0.464	0.00415	-0.937	1.53e-09
SUB1	-0.306	0.0342	-0.447	0.00189	-0.755	2.77e-06
SUN2	0.421	0.0084	0.535	0.00072	0.961	0.000435
SUN3	-0.979	0.00153	-0.604	0.0473	-1.648	0.00302
SUSD5	-0.237	0.0272	-0.222	0.0294	-0.441	0.00347
SWAP70	0.189	0.0122	0.165	0.0316	0.368	0.000626
SYK	0.655	0.00561	0.759	0.00142	1.494	1.34e-05
SYT11	-0.18	0.00626	-0.188	0.00414	-0.352	0.00157
SYTL2	-0.225	0.0321	-0.252	0.0147	-0.467	1.17e-05
SYTL4	0.721	0.00818	0.666	0.0145	1.389	0.000675
TANC1	0.332	0.015	0.502	4.26e-05	0.853	1.55e-05
TARBP1	-0.404	4.11e-05	-0.276	0.00449	-0.658	0.000951
TASL	0.949	0.0104	0.885	0.0184	1.992	0.00174
TASOR	0.133	0.024	0.117	0.0397	0.261	0.0194
TASP1	-0.3	0.00227	-0.334	0.00074	-0.622	2.49e-06
TBC1D9	-0.273	0.00558	-0.39	8.64e-05	-0.653	0.00028
TBL1X	0.241	0.0462	0.272	0.0252	0.526	0.000432
TBX6	0.796	0.00413	0.771	0.0053	1.618	7.81e-05
TBXAS1	0.498	0.00733	0.778	4.22e-05	1.3	3.19e-06
TCEAL7	-0.244	0.00998	-0.233	0.0136	-0.461	0.00454
TCIRG1	0.383	0.0473	0.537	0.00503	0.927	6.49e-05
TCTE1	-0.373	0.0135	-0.345	0.0234	-0.684	0.000782
TDG	-0.192	0.0313	-0.193	0.0307	-0.374	0.0252
TECTA	-0.259	0.0122	-0.439	2.04e-05	-0.679	0.000419
TEPSIN	0.275	0.017	0.26	0.0225	0.532	0.0139
TEX22	0.233	0.00856	0.213	0.0133	0.457	0.00853
TFEB	0.499	0.00888	0.635	0.000795	1.141	0.000174
TFEC	0.538	0.00998	0.499	0.0186	1.087	7.46e-05
THBS2	0.561	0.00124	0.386	0.0226	0.924	0.0012
THCAT155	-0.558	0.0259	-0.633	0.0121	-1.155	2.34e-05
THEMIS2	0.515	0.00597	0.454	0.0156	1.005	2.85e-05
TIMM44	0.429	0.000103	0.233	0.0434	0.685	3.55e-05
TLDC2	0.434	0.00287	0.378	0.00926	0.828	4.61e-05
TLE4	0.305	0.0151	0.432	0.000373	0.751	0.000521
TLN1	0.211	0.0392	0.222	0.0281	0.437	0.000461
TLR1	0.659	0.000756	0.611	0.00241	1.339	1.12e-06
TLR5	0.722	8.86e-06	0.438	0.00767	1.183	2.05e-05
TLR7	0.765	0.0301	0.825	0.0189	1.537	0.00216
TLR8	0.91	0.00266	0.76	0.0268	1.8	0.000144
TMC6	0.523	0.0176	0.736	0.000778	1.272	0.00026
TMC8	0.651	0.019	0.787	0.00483	1.557	5.7e-05
TMCC2	0.357	0.0116	0.423	0.00262	0.786	0.000195
TMEM132E	-0.269	0.045	-0.271	0.0439	-0.518	0.0104
TMEM14A	-0.345	0.00332	-0.252	0.0342	-0.58	0.00577
TMEM53	0.228	0.0454	0.365	0.00119	0.597	0.00375
TOB2	0.322	0.00909	0.383	0.00189	0.717	0.00101
TP53I3	0.245	0.0396	0.427	0.0003	0.69	0.000282
TPBGL	-0.675	0.0223	-0.897	0.00209	-1.515	0.00169
TPRN	0.314	0.0373	0.495	0.00108	0.808	0.00202
TRDN	0.676	0.02	0.62	0.0384	1.284	0.000509
TRIM3	-0.159	0.0266	-0.205	0.00384	-0.346	0.0016
TRIM33	-0.124	0.00609	-0.105	0.0131	-0.22	0.00747
TRIM36	-0.454	0.00587	-0.433	0.00939	-0.881	8.95e-05
TRIM62	0.261	0.0191	0.292	0.00928	0.563	0.00538
TRIM8	0.191	0.0449	0.3	0.00152	0.498	0.00221
TRNAU1AP	0.218	0.0113	0.186	0.0321	0.416	0.00709
TRRAP	0.14	0.00248	0.128	0.00746	0.279	0.000287
TSC22D3	0.362	0.00678	0.411	0.00236	0.781	0.000176
TSEN15	0.356	0.000369	0.282	0.0037	0.649	6.09e-05
TSFM	-0.227	0.0106	-0.233	0.00804	-0.445	0.0046
TSPO	0.499	0.0119	0.419	0.0346	0.948	6.69e-05
TSPYL5	-0.287	0.0299	-0.33	0.0121	-0.612	0.00171
TTC5	-0.399	0.000976	-0.395	0.00155	-0.787	0.000179
TTYH2	0.519	0.0461	0.694	0.00721	1.22	0.00242
TUBA1B	-0.37	0.0023	-0.258	0.037	-0.623	9.54e-06
UBE2R2	0.194	2.56e-05	0.148	0.000531	0.353	5.99e-05
UBFD1	-0.164	0.0352	-0.224	0.00363	-0.377	0.00115
UBLCP1	-0.209	0.00991	-0.259	0.000376	-0.458	0.000138
UBXN2A	0.215	0.00994	0.235	0.00506	0.466	0.00168
UCKL1	0.318	0.000529	0.461	6.23e-07	0.786	2.71e-07
UHRF1	0.675	0.000437	0.541	0.00558	1.234	0.000131
UNKL	0.265	0.0045	0.282	0.00428	0.558	0.000571
USP11	-0.328	0.013	-0.295	0.0259	-0.614	0.00238
USP47	0.232	6.83e-05	0.161	0.00364	0.407	0.000121
USP5	-0.212	0.039	-0.22	0.0322	-0.415	0.00423
UTP25	-0.147	0.0192	-0.204	0.00129	-0.342	0.000516
VAC14	0.145	0.013	0.134	0.0242	0.284	0.0154
VAPB	-0.121	0.0458	-0.223	0.000273	-0.329	0.0043
VAV1	0.557	0.0275	0.663	0.00945	1.298	8.81e-05
VEZF1	0.352	0.00653	0.392	0.00218	0.753	0.00378
VEZT	-0.163	0.00132	-0.186	0.00021	-0.339	0.000326
VSIR	0.522	0.00819	0.501	0.0138	1.037	2.78e-05
WDR64	1.092	0.00415	0.78	0.0466	1.632	0.00191
WDR86-AS1	-1.237	0.0133	-1.22	0.0165	-2.324	0.00565
WHRN	0.466	0.0173	0.471	0.0147	0.979	0.00153
WWC3	0.137	0.0117	0.128	0.0177	0.275	0.00136
XK	-1.728	0.0232	2.073	0.00559	-0.674	0.00963
XRCC3	0.254	0.0238	0.324	0.00421	0.578	0.00427
XYLB	-0.202	0.00576	-0.246	0.00076	-0.437	2.84e-05
YWHAZ	-0.346	0.00145	-0.317	0.00355	-0.657	1.02e-06
ZBED6	0.237	0.00282	0.226	0.00361	0.476	0.00176
ZBTB16	0.269	0.0404	0.272	0.0394	0.555	0.00127
ZC2HC1A	-0.212	0.0149	-0.244	0.00563	-0.441	0.00589
ZC3H11A	0.237	0.00282	0.226	0.00361	0.476	0.00176
ZCCHC24	0.447	0.00228	0.557	0.000197	1.011	6.16e-06
ZGPAT	0.27	0.00329	0.216	0.0191	0.498	0.00363
ZMIZ1-AS1	-0.401	0.000159	-0.291	0.00504	-0.668	4.89e-05
ZMYND8	0.238	0.0097	0.267	0.00314	0.514	6.84e-05
ZNF10	-0.234	0.0257	-0.374	0.000367	-0.594	0.0008
ZNF184	-0.399	0.00661	-0.397	0.00711	-0.791	0.000178
ZNF25	-0.181	0.0318	-0.168	0.0459	-0.338	0.00905
ZNF345	0.167	0.00948	0.197	0.00134	0.383	0.000901
ZNF347	0.202	0.0168	0.284	0.00102	0.501	0.00113
ZNF441	-0.45	0.00494	-0.365	0.0202	-0.831	3.78e-05
ZNF542P	-0.188	0.047	-0.196	0.0385	-0.374	0.0201
ZNF561-AS1	0.177	0.0112	0.17	0.0157	0.357	0.0034
ZNF592	0.127	0.0319	0.137	0.0192	0.268	0.0115
ZNF652	0.486	0.00509	0.442	0.00954	0.929	0.000725
ZNF672	0.204	0.0208	0.193	0.0318	0.406	0.014
ZNF787	0.225	0.0188	0.231	0.0131	0.464	0.00752
ZNF860	-0.642	0.0402	-0.918	0.00363	-1.53	0.00235
ZRANB3	-0.101	0.0339	-0.166	0.000442	-0.257	0.00336
ZXDC	0.155	0.0199	0.151	0.0228	0.316	0.00966
Based on the deseq, and filtered using IPA, genes that were expressed in all COVID-19 and AD datasets with an absolute expression of 0.0001 or greater and p<0.05 are presented in Supplemental Data 2. Expr. Is expression.
