# Supplementary material for: Recapitulation of pathophysiological features of AD in SARS-CoV-2-infected subjects
Source: eLife. 2023 Jul 7;12:e86333. doi: 10.7554/eLife.86333 (PMC10361716; doi:10.7554/eLife.86333)
Supplement: Source data 2. [file elife-86333-data2.xlsx]

## Sheet: Supplemental Data 2
Source data 2: Gene regulation within the HF
	AD vs. control		SARS-CoV-2 vs. control		AD+SARS-CoV-2 vs. control
Gene	Expr. Log Ratio	Expr. p-value	Expr. Log Ratio	Expr. p-value	Expr. Log Ratio	Expr. p-value
ABCA10	-0.343	0.00848	-0.347	0.00792	-0.659	0.00263
ABCC12	-1.152	0.000204	-0.715	0.0266	-1.704	0.00124
ACIN1	0.13	0.0118	0.212	4.17e-05	0.341	0.000381
ACTR3B	-0.176	0.0491	-0.304	0.000659	-0.486	0.0019
ADAMTS2	0.669	0.0112	0.539	0.0407	1.192	0.000429
ADAT3	0.349	0.0247	0.4	0.011	0.757	0.00227
AEBP1	0.511	0.0297	0.574	0.0143	1.094	0.0025
AGAP6 (includes others)	0.241	0.0489	0.296	0.0165	0.538	0.00991
AHSA2P	0.225	0.0205	0.332	0.000663	0.554	0.00143
ALOX15B	0.905	0.0449	0.94	0.0347	1.954	0.00493
ANAPC16	0.275	0.0255	0.322	0.0087	0.608	0.000379
ANKRD20A18P	0.894	0.0488	1.087	0.0153	1.852	0.00369
ANKRD20A4P (includes others)	-0.955	0.00296	-0.857	0.0272	-1.324	0.00454
ANKRD34B	-1.331	0.000434	-1.243	0.00423	-2.696	0.000132
APOO	-0.214	0.00259	-0.212	0.00293	-0.435	0.000191
ARAP1	0.253	0.00646	0.538	8.36e-09	0.805	1.51e-07
ARAP1-AS2	0.274	0.0329	0.669	1.97e-07	0.957	7.16e-06
ARHGAP36	-1.313	0.00107	-1.551	0.000104	-3.058	0.000136
ARSG	-0.553	0.00152	-0.703	5.1e-05	-1.235	1.09e-05
ASAH2B	-0.437	0.00894	-0.604	0.000386	-1.039	2.24e-06
ATG4B	0.242	0.0128	0.28	0.00346	0.518	7.02e-05
ATOH8	0.569	0.00803	0.571	0.00786	1.12	0.00393
ATP6V0E2-AS1	-0.174	0.0349	-0.317	9.89e-05	-0.497	0.000494
AUP1	0.237	0.0201	0.303	0.00347	0.549	0.000494
B3GALNT1	-0.287	0.0229	-0.329	0.00962	-0.626	0.0135
B3GAT1-DT	-0.608	0.00108	-0.501	0.00715	-1.023	0.000799
BAG6	-1.195	0.0407	-2.088	0.00033	-3.222	0.00082
BANP	0.397	0.0322	0.46	0.0129	0.907	0.000589
BCLAF3	-0.166	0.00615	-0.16	0.00521	-0.332	0.000403
BLCAP	-0.253	0.0145	-0.298	0.00329	-0.567	0.00369
BMP1	0.288	0.0362	0.383	0.00517	0.679	0.00216
BOLA2/BOLA2B	-4.101	0.00151	-0.848	0.00791	-4.535	0.00929
BRF1	0.201	0.000541	0.211	0.000279	0.41	4.14e-05
BUB1B	-0.645	0.0315	-0.674	0.0239	-1.387	0.00806
CACNA2D4	-0.297	0.0343	-0.29	0.0403	-0.595	0.00503
CAPN2	0.281	0.00556	0.285	0.00379	0.562	0.000883
CAPZB	0.191	0.000246	0.13	0.0129	0.318	0.000579
CARD11	0.648	0.0165	0.583	0.0304	1.197	0.000447
CARHSP1	0.241	0.00518	0.351	4.71e-05	0.595	2.51e-05
CASP7	0.45	0.0244	0.719	0.000184	1.213	0.000402
CBS/LOC102724560	1.59	6.61e-05	0.879	0.0262	2.431	0.000179
CCDC144NL-AS1	-0.242	0.0263	-0.236	0.0286	-0.483	0.0171
CCDC32	-0.177	0.0353	-0.344	4.43e-05	-0.525	5.14e-05
CCPG1	-0.16	0.0206	-0.263	0.00011	-0.423	0.0018
CCSER2	-0.112	0.0191	-0.14	0.00239	-0.257	0.000215
CD200	-0.329	0.0355	-0.353	0.0237	-0.685	0.00679
CDC42EP2	0.453	0.0374	0.445	0.0398	0.894	0.00083
CDK15	-0.722	0.0191	-0.702	0.0233	-1.42	0.0153
CDK2AP1	0.316	0.00474	0.327	0.00265	0.637	0.00107
CDK6-AS1	-0.674	0.023	-0.75	0.0115	-1.429	0.00119
CHDH	0.295	0.0432	0.515	0.000492	0.813	0.000469
CHEK2	0.596	0.00083	0.543	0.00225	1.184	1.91e-05
CHKB-CPT1B	0.314	0.0271	0.37	0.0084	0.671	0.000492
CHST3	0.47	0.0476	0.502	0.0341	0.914	0.00437
CIP2A	-0.607	0.00813	-0.694	0.00255	-1.278	0.000184
CLASRP	0.197	0.0253	0.382	2.88e-05	0.582	0.000967
CLCN2	0.294	0.00976	0.241	0.0336	0.535	0.00526
CLDN15	0.361	0.0227	0.797	6.44e-07	1.169	8.55e-08
CLK1	0.355	0.000468	0.235	0.0203	0.595	0.000141
COLGALT1	0.366	0.00246	0.375	0.00157	0.743	4.81e-05
COPG2	-0.357	0.0451	-0.438	0.0125	-0.815	0.011
COPS7A	-0.227	0.00763	-0.327	0.000178	-0.558	8.49e-05
COX7B	-0.232	0.0275	-0.278	0.00832	-0.509	0.00123
CRYAB	0.425	0.0446	0.578	0.0063	1.092	0.000476
CRYBA1	0.52	0.0213	0.48	0.0323	0.971	0.00218
CSRP1	0.498	0.00224	0.41	0.0118	0.907	0.000363
CTBP2	0.299	0.000533	0.293	0.000696	0.595	5.79e-05
CTF2P	1.004	0.0368	1.522	0.00188	2.471	0.00079
CTTN	0.159	0.0286	0.154	0.0339	0.308	0.0168
DAZAP1	0.235	0.00445	0.339	3.98e-05	0.577	3.81e-05
DDX11L2	0.956	0.0102	0.796	0.0322	1.58	0.00376
DDX23	0.224	0.0182	0.199	0.0356	0.416	0.0165
DEK	0.294	0.000896	0.259	0.00335	0.557	0.000445
DGKH	-0.271	0.00467	-0.215	0.028	-0.492	0.00831
DHODH	0.283	0.00734	0.237	0.0248	0.526	0.00413
DHX57	-0.198	0.0138	-0.229	0.00471	-0.432	0.00222
DIRAS3	-0.775	0.00158	-0.589	0.0176	-1.409	0.00205
DLD	-0.163	0.0164	-0.215	0.0015	-0.384	0.00123
DNAAF4-CCPG1	-0.17	0.00931	-0.242	0.000185	-0.41	0.00249
DNAJC5G	-0.563	0.0402	-1.009	0.000295	-1.504	0.00185
DNAL4	-0.32	0.0256	-0.368	0.0103	-0.694	0.00179
DOT1L	0.274	0.0163	0.235	0.0399	0.5	0.00432
DPF2	0.111	0.0478	0.189	0.000762	0.301	0.000826
DPY19L2P3	-0.296	0.00463	-0.333	0.0014	-0.635	0.000817
DRD3	-1.295	0.0272	-1.256	0.0455	-2.669	0.0109
DSCR9	-0.435	0.0224	-0.419	0.03	-0.877	0.00495
EFHD1	0.544	0.0336	0.521	0.0405	1.023	0.00168
EGFEM1P	-0.492	0.0103	-0.39	0.042	-0.889	0.0021
EGFL6	-1.089	0.0265	-1.495	0.0035	-2.451	0.00266
EHMT1	0.14	0.0103	0.189	0.000532	0.328	0.000386
ELF1	0.303	0.0253	0.28	0.0389	0.572	0.00168
ELMOD3	0.285	0.000283	0.314	6.11e-05	0.597	3.86e-06
ELOA-AS1	0.248	0.00601	0.229	0.0126	0.48	0.00199
EMBP1	-0.415	0.0366	-0.416	0.0352	-0.904	0.00536
EMP3	0.593	0.0136	0.499	0.0334	1.159	0.000269
EPS8L3	1.336	0.0235	1.235	0.0362	2.545	0.00577
ERCC8	-0.132	0.0465	-0.129	0.0466	-0.27	0.0107
ERI3	0.135	0.0415	0.206	0.00167	0.337	0.000308
FAM133B	0.331	0.000836	0.206	0.0385	0.538	0.000648
FAM3D-AS1	0.485	0.0326	0.703	0.00205	1.176	0.000812
FAM53B	0.314	0.00577	0.337	0.00295	0.647	2.27e-05
FBXO2	0.367	0.039	0.615	0.000229	0.977	9.57e-05
FCGR2A	0.587	0.00387	0.457	0.0219	0.994	0.00109
FCHO1	0.341	0.0267	0.373	0.0154	0.705	5.06e-05
FLII	0.238	0.00351	0.334	4.04e-05	0.572	0.000121
FREM3	-0.619	0.00201	-0.607	0.00231	-1.182	0.000538
FSCN2	0.58	0.0271	0.952	0.000279	1.526	8.38e-05
GAD2	-0.759	0.0171	-0.828	0.0106	-1.586	0.00107
GGT4P	-1.214	0.0177	-1.528	0.00385	-2.405	0.000214
GNA13	0.324	0.000881	0.304	0.00147	0.638	0.000348
GNG4	-0.587	0.00166	-0.487	0.0126	-1.028	0.000118
GNRH1	0.478	0.048	0.464	0.0469	0.947	0.00206
GOLGA8A/GOLGA8B	-0.46	0.0498	-0.386	0.0407	-0.783	0.0242
GPR101	-1.277	0.00268	-1.387	0.00254	-2.715	0.000476
GPR39	-0.384	0.0101	-0.473	0.00132	-0.875	0.000178
GPR4	0.505	0.0465	0.592	0.0188	1.105	0.00232
GPRC5B	0.305	0.0337	0.409	0.00435	0.714	9.42e-05
GSTA4	-0.202	0.025	-0.292	0.000887	-0.492	0.00741
GTF2IP7	-0.753	0.027	-0.722	0.0346	-1.517	0.000326
HCLS1	0.532	0.0111	0.763	0.000253	1.324	3.07e-05
HDAC4	0.199	0.000697	0.311	1.03e-07	0.509	5.11e-06
HDGF	0.23	0.00431	0.28	0.000402	0.509	0.00169
HEXD	0.368	0.00252	0.519	1.49e-05	0.875	1.2e-07
HMBOX1	0.215	0.00344	0.224	0.00209	0.436	0.000807
HMG20B	0.368	0.0124	0.358	0.0153	0.733	0.00781
HNRNPA2B1	0.215	0.000235	0.124	0.0339	0.34	0.000853
HP1BP3	0.19	0.0442	0.202	0.0329	0.392	0.00384
HS6ST2	-0.568	0.0175	-0.487	0.0482	-1.06	0.00821
ICA1	-0.477	0.00286	-0.428	0.00739	-0.861	0.00576
IKBKB	0.146	0.0483	0.325	1.15e-05	0.47	0.000602
IL1RL2	-0.562	0.00447	-0.45	0.0205	-0.998	0.000987
INSR	0.162	0.0257	0.251	0.000612	0.408	0.00068
IP6K2	0.177	0.0276	0.175	0.0293	0.348	0.00557
IRS2	0.343	0.0192	0.299	0.0406	0.644	0.00411
ITGA11	0.461	0.0195	0.749	0.000104	1.186	9.31e-05
ITGB8-AS1	0.359	0.0291	0.532	0.00121	0.865	0.00137
ITPKB	0.505	0.00692	0.375	0.0446	0.855	0.000879
IWS1	0.266	0.0026	0.182	0.0372	0.446	6.72e-05
JAKMIP3	0.403	0.00631	0.389	0.00844	0.791	5.39e-05
JPT1	-0.216	0.0109	-0.281	0.000994	-0.503	0.000489
KCNE4	0.604	0.00747	0.59	0.00814	1.205	0.000289
KLC1	0.095	0.0365	0.102	0.0246	0.194	0.00894
KLF15	0.385	0.0326	0.784	1.61e-05	1.156	0.000199
KLHDC10	-0.129	0.0286	-0.26	6.28e-06	-0.396	8.66e-05
KLHL21	0.299	0.0337	0.396	0.00467	0.705	0.00137
KLHL42	-0.155	0.0316	-0.264	0.000268	-0.423	0.00215
LANCL2	-0.26	0.00788	-0.217	0.0249	-0.476	0.00183
LBX2	0.694	0.0265	0.741	0.0186	1.477	0.00157
LCLAT1	-0.181	0.0425	-0.308	0.000528	-0.489	0.000159
LDAH	-0.231	0.0295	-0.232	0.0267	-0.463	0.0158
LENG8	-2.345	0.0003	-2.389	0.000179	-3.922	6.41e-05
LINC00390	-0.835	0.002	-0.62	0.0258	-1.426	0.00145
LINC00484	0.737	0.0273	0.48	0.0148	1.145	0.0257
LINC00501	-0.999	0.00118	-0.62	0.0376	-1.537	0.00545
LINC00842	-0.816	0.0157	-0.791	0.0208	-1.61	0.000762
LINC00862	0.438	0.0432	0.538	0.0131	1.033	0.000687
LINC00921	0.568	0.0136	0.475	0.0417	1.149	0.00202
LINC00923	-0.507	0.0374	-0.596	0.0128	-1.153	0.00327
LINC01013	-0.64	0.0076	-0.51	0.032	-1.119	0.00127
LINC01090	-0.498	0.0482	-0.765	0.00253	-1.252	0.0011
LINC01134	0.767	0.0341	0.993	0.00607	1.735	0.00291
LINC01168	-1.374	0.00017	-0.948	0.0127	-2.347	0.000112
LINC01277	-0.47	0.0201	-0.538	0.00774	-0.984	0.00175
LINC01310	-0.646	0.00751	-0.563	0.0204	-1.128	0.00234
LINC01362	-0.432	0.03	-0.432	0.0317	-0.862	0.00763
LINC01440	-1.247	0.0025	-1.229	0.00467	-2.492	1.34e-05
LINC01537	-1.061	0.000127	-0.538	0.0436	-1.536	0.00133
LINC01730	1.02	0.00672	0.786	0.0356	1.862	0.00263
LINC01736	0.956	0.0388	1.16	0.0121	2.078	0.00138
LINC01807	-0.492	0.0469	-0.635	0.0105	-1.15	0.0014
LINC01878	0.721	0.00936	0.566	0.0413	1.301	0.00282
LINC02008	-0.763	0.00226	-0.514	0.0436	-1.241	9.88e-05
LINC02211	-3.177	3.56e-05	-1.979	0.0104	-5.003	0.000177
LINC02320	-0.868	0.000196	-0.728	0.00199	-1.546	0.000174
LINC02397	1.506	0.0225	1.997	0.00259	3.053	5.3e-05
LINC02752	-1.126	0.000264	-0.915	0.00423	-1.92	3.4e-07
LINC02756	-1.097	0.0173	-1.028	0.0276	-2.046	0.00927
LINC02774	-0.697	0.000798	-0.462	0.0254	-1.128	0.00298
LNCAROD	0.773	0.0213	1.034	0.00204	1.749	6.05e-05
LYRM9	-0.566	0.00214	-0.632	0.000568	-1.17	3.2e-05
MAD1L1	0.249	0.0196	0.502	2.18e-06	0.764	0.000156
MAGED1	-0.157	0.0448	-0.333	1.4e-06	-0.492	0.000269
MAP3K13	-0.173	0.0351	-0.267	0.00115	-0.44	0.000265
MAP4K3-DT	-0.265	0.0412	-0.346	0.00754	-0.603	0.0203
MCMDC2	0.739	0.00514	0.524	0.0468	1.328	0.000546
MEAK7	-0.261	0.0167	-0.312	0.00464	-0.576	0.000707
MEG9	-0.549	0.0135	-0.514	0.0192	-1.031	0.00953
MEP1A	1.748	0.0034	1.196	0.0428	2.708	0.00322
MEST	-0.374	0.0325	-0.4	0.0219	-0.801	0.00915
METAP1D	-0.28	0.0383	-0.335	0.0134	-0.62	0.00259
MIA	1.046	0.0199	1.13	0.0122	2.044	0.00392
MIA-RAB4B	0.226	0.0323	0.214	0.0445	0.453	0.00677
MID1IP1	0.463	0.00252	0.477	0.00187	0.94	2.36e-05
MOB1A	0.183	0.0241	0.19	0.0192	0.377	0.00189
MS4A14	0.622	0.0268	0.962	0.00059	1.595	0.000142
MS4A6E	0.581	0.0265	0.764	0.00344	1.299	0.000566
MS4A7	0.535	0.041	0.776	0.00301	1.27	0.000968
MS4A8	-1.153	0.0014	-1.081	0.00275	-2.386	5.37e-05
MT1E	0.387	0.0338	0.88	1.15e-06	1.264	1.25e-06
MT1F	0.473	0.0323	1.103	6.2e-07	1.567	5.23e-07
MT1G	0.574	0.0255	1.301	1.71e-07	1.887	4.4e-07
MTCO3P12	-0.679	0.0331	-0.708	0.03	-1.252	0.00507
MTMR14	0.146	0.0337	0.203	0.00277	0.35	0.0105
NBPF10 (includes others)	0.278	0.049	0.343	0.0335	0.62	0.0015
NCR3LG1	-0.315	0.0172	-0.403	0.00234	-0.706	0.000707
NDUFA5	-0.209	0.0441	-0.5	7.4e-07	-0.718	5.71e-05
NDUFAF6	0.195	0.0366	0.262	0.0049	0.459	0.00102
NEAT1	0.9	1.67e-05	0.464	0.0259	1.378	3.92e-05
NKX6-2	0.441	0.0389	0.848	6.97e-05	1.269	5.61e-08
NLRP3P1	-0.82	0.0103	-0.626	0.0485	-1.374	0.00561
NMD3	-0.401	0.000222	-0.244	0.0257	-0.64	0.000591
NRIR	-0.505	0.0356	-0.592	0.0154	-1.058	0.000838
NRSN2	-0.358	0.00275	-0.264	0.0272	-0.619	0.000798
NTNG1	-0.318	0.0112	-0.478	0.000172	-0.793	4.9e-06
NUP188	0.151	0.0249	0.175	0.0073	0.329	0.00302
NUP42	-0.379	0.000944	-0.287	0.0129	-0.668	0.000655
OLMALINC	0.565	0.00148	0.38	0.0251	0.948	0.000537
OR2AG2	-0.748	0.0149	-0.702	0.0222	-1.313	0.00663
P2RX7	0.25	0.0264	0.32	0.00439	0.566	0.000106
PACS2	0.228	0.0171	0.296	0.0019	0.518	0.00184
PALLD	0.322	0.0432	0.4	0.0111	0.744	0.00647
PARVG	0.487	0.00521	0.884	1.06e-07	1.36	2.04e-07
PCDH1	-0.306	0.00214	-0.264	0.00822	-0.576	0.00107
PCID2	0.236	0.021	0.238	0.0192	0.471	0.00452
PCSK1	-0.374	0.0494	-0.734	0.000107	-1.09	4.81e-05
PCYOX1L	-0.59	0.000907	-0.559	0.00169	-1.098	0.000173
PENK	-2.247	0.00163	-1.81	0.0156	-4.081	0.00042
PHF19	0.437	0.00966	0.543	0.00132	0.968	1.55e-06
PIAS4	0.276	0.000425	0.414	1.16e-07	0.685	4.5e-08
PID1	-0.33	0.00602	-0.266	0.028	-0.596	0.00149
PIPOX	-0.534	2.35e-07	-0.243	0.0216	-0.775	5.64e-06
PKN2-AS1	-0.367	0.0113	-0.322	0.0259	-0.695	0.00703
PLIN3	0.548	0.015	0.475	0.0355	0.985	0.00233
PLOD3	0.432	0.00376	0.536	0.000312	1.045	5.68e-05
PLXNB1	0.314	0.0173	0.536	5.25e-05	0.841	1.74e-05
PMS2P4	-0.462	0.000698	-0.311	0.0226	-0.78	0.000637
POLD1	0.313	0.0157	0.516	0.000109	0.847	0.000304
POLR2H	0.189	0.0399	0.272	0.00275	0.45	0.00458
PPP1R2	-0.18	0.0484	-0.416	4.93e-06	-0.597	1.74e-05
PPP4R3A	0.133	0.0166	0.115	0.0384	0.245	0.00213
PRDM16	0.332	0.0248	0.288	0.0489	0.611	0.0211
PRDX6	0.226	0.0176	0.255	0.00693	0.482	0.000973
PREX1	0.315	0.0392	0.489	0.00135	0.796	5.83e-05
PRKX	0.573	0.00384	0.44	0.0235	0.993	0.00061
QDPR	0.464	0.0114	0.445	0.0138	0.937	0.000187
RAB29	0.335	0.0133	0.366	0.00642	0.717	0.00382
RAB41	0.442	0.0424	0.57	0.00815	1.092	0.00361
RAB9A	0.261	0.0142	0.237	0.0252	0.494	0.00545
RAF1	0.177	0.00149	0.123	0.0347	0.3	0.00357
RALGAPA2	0.201	0.00472	0.185	0.00916	0.382	0.000307
RANBP3	0.189	0.0195	0.311	9.55e-05	0.5	0.000291
RASAL3	0.526	0.0286	0.998	3.29e-05	1.527	4.03e-05
RBFOX2	-0.151	0.0462	-0.25	0.000924	-0.406	0.00261
RELA	0.312	0.0211	0.475	0.000475	0.803	0.000204
RENBP	0.566	0.000103	0.517	0.000288	1.087	3.99e-06
RGCC	0.43	0.0296	0.501	0.0122	0.891	0.000739
RGS17	-0.299	0.00541	-0.317	0.00329	-0.604	0.00353
RHOQ	0.387	0.00135	0.238	0.0476	0.628	0.000815
RNF169	0.177	0.0341	0.222	0.00816	0.4	0.000379
RNF216	0.141	0.00535	0.107	0.0339	0.25	0.0148
RNFT2	-0.292	0.00838	-0.224	0.041	-0.519	0.00722
RPH3A	-0.606	0.0169	-0.731	0.00395	-1.321	0.00189
RPS6KA1	0.358	0.0479	0.431	0.0183	0.781	0.000759
RPTOR	0.149	0.0116	0.166	0.00499	0.313	0.00303
RREB1	0.28	0.036	0.305	0.0211	0.591	0.00327
RSAD1	0.271	0.0381	0.321	0.0129	0.598	0.00176
RTF1	-0.155	0.0331	-0.285	7.15e-05	-0.448	5.36e-05
RUNX1	0.47	0.000305	0.615	2.16e-06	1.073	9e-08
SAFB	0.2	0.000128	0.137	0.00846	0.335	3.23e-05
SAFB2	0.242	0.022	0.281	0.00728	0.518	0.00126
SAP30	0.37	0.00141	0.253	0.0264	0.608	0.000946
SCN7A	-0.369	0.0474	-0.488	0.0124	-0.837	0.0177
SEC22A	-0.168	0.00855	-0.285	2.23e-06	-0.458	5.15e-05
SEC24B-AS1	-0.416	0.0174	-0.399	0.0225	-0.783	0.00979
SEPTIN8	0.23	0.0309	0.33	0.002	0.545	0.000355
SEZ6	-0.585	8.65e-05	-0.35	0.0201	-0.933	0.000137
SH2D6	1.052	3.7e-05	0.555	0.0263	1.592	0.000123
SHKBP1	0.329	0.0368	0.47	0.00283	0.805	0.00164
SHMT1	0.486	0.000875	0.377	0.00979	0.86	0.000167
SIRPB2	0.595	0.0194	0.714	0.00543	1.307	6.59e-05
SLC22A23	0.326	0.00147	0.27	0.00635	0.58	0.00017
SLC26A7	0.606	0.00674	0.441	0.0494	1.089	0.00207
SLC2A5	0.711	0.00468	0.607	0.0179	1.212	0.00143
SLC39A11	0.667	8.51e-05	0.359	0.0334	1.014	3.7e-08
SLC7A2	0.653	0.00928	0.624	0.0121	1.237	1.01e-05
SLC8A3	-0.651	0.000696	-0.413	0.0337	-1.045	0.00197
SMAD1-AS2	0.587	0.0129	0.61	0.0106	1.226	0.0015
SMG5	0.161	0.0229	0.235	0.000787	0.39	0.0141
SMG9	0.254	0.0354	0.315	0.00853	0.571	0.000658
SMIM1	0.89	0.00556	0.835	0.00799	1.859	0.000377
SMPD4	0.141	0.0138	0.23	8.17e-05	0.37	5.01e-05
SNHG10	0.383	0.0147	0.444	0.00411	0.828	0.000204
SNRK	-0.232	2.44e-06	-0.137	0.00618	-0.373	3.35e-05
SOWAHB	-0.566	0.037	-0.601	0.027	-1.091	0.0173
SPACA6	0.327	0.0212	0.292	0.0395	0.622	0.00488
SPACA6-AS1	0.397	0.0164	0.383	0.0203	0.768	0.00223
SPR	0.534	0.0383	0.701	0.00636	1.247	0.00023
SPTSSB	-0.675	0.00281	-0.782	0.000502	-1.401	0.000628
SRGAP1	0.204	0.0142	0.275	0.000969	0.478	0.000833
SST	-0.951	0.0296	-1.47	0.000739	-2.468	5.96e-06
STARD10	0.293	0.0266	0.443	0.000753	0.739	0.0009
STARD3	0.171	0.0499	0.422	1.46e-06	0.596	1.36e-06
STARD4-AS1	-0.474	0.0024	-0.6	0.000145	-1.051	3.65e-05
STPG4	0.271	0.0375	0.337	0.00977	0.61	0.00294
STS	-0.284	0.0127	-0.313	0.00661	-0.582	0.0231
STUM	-0.536	0.000924	-0.362	0.0249	-0.905	0.00163
SULF2	-0.313	0.0237	-0.323	0.0199	-0.622	0.00531
SUN2	0.337	0.0346	0.355	0.0245	0.67	5.32e-05
SUN3	-1.146	0.00226	-0.957	0.00976	-1.97	0.000284
SV2C	-1.026	0.000743	-0.861	0.00802	-1.794	0.0013
SWI5	0.175	0.00767	0.183	0.00495	0.373	0.00925
SYNM	0.376	0.0379	0.358	0.0485	0.703	0.0302
SYTL4	0.754	0.00575	0.714	0.0089	1.457	0.000144
TAF1C	0.274	0.0096	0.485	2.78e-06	0.746	9.55e-08
TARBP1	-0.38	0.000147	-0.395	6.43e-05	-0.769	0.000181
TASP1	-0.213	0.0352	-0.329	0.00122	-0.543	0.000268
TBCC	-0.314	0.0292	-0.295	0.0371	-0.626	0.0029
TBX19	0.367	0.024	0.334	0.0438	0.7	0.00275
TBX6	0.681	0.00901	0.72	0.00589	1.48	0.00155
TDG	-0.262	0.00775	-0.25	0.0114	-0.52	0.000115
TECTA	-0.262	0.0185	-0.48	1.55e-05	-0.744	9.43e-07
TEMN3-AS1	-1.143	0.00719	-1.269	0.00197	-2.589	0.000564
TENM3-AS1	-0.592	0.00603	-0.666	0.00219	-1.305	0.000331
TGFB3	0.324	0.0446	0.408	0.0115	0.697	0.0252
TLR5	0.518	0.00118	0.544	0.000793	1.043	0.000998
TMC6	0.515	0.0191	0.562	0.0101	1.059	1.75e-05
TMCC2	0.306	0.0305	0.3	0.0327	0.61	0.00354
TMEM53	0.259	0.0227	0.252	0.0251	0.504	7.36e-05
TPD52L1	0.365	0.0214	0.325	0.0371	0.693	0.00388
TRIM54	-0.769	0.00234	-0.851	0.000868	-1.546	0.00021
TRIM9	-0.231	0.0248	-0.272	0.0092	-0.506	0.00615
TRPC1	-0.165	0.0108	-0.209	0.00101	-0.379	0.000307
TTC31	0.213	0.0351	0.203	0.0454	0.42	0.0167
TUBB1	0.659	0.0021	0.475	0.028	1.079	0.00189
TUBB3	-0.414	0.0377	-0.509	0.0104	-0.951	0.000509
UBE2D3-AS1	0.336	0.027	0.408	0.0078	0.738	0.00155
UBLCP1	-0.249	0.00609	-0.533	2.42e-10	-0.793	4.31e-08
UBXN2A	0.283	0.00125	0.251	0.00435	0.536	0.00032
UCKL1	0.234	0.0104	0.466	4.05e-07	0.701	2.28e-05
UHRF1	0.39	0.0368	0.508	0.00761	0.89	0.000131
UNG	0.257	0.0206	0.292	0.00605	0.558	0.00352
UROS	-0.272	0.0152	-0.244	0.0326	-0.511	0.00452
USF2	0.139	0.0446	0.225	0.00102	0.361	0.000977
VEZT	-0.125	0.0198	-0.249	2.5e-06	-0.379	2.63e-05
VGF	-1.065	0.00489	-1.405	0.000245	-2.426	1.41e-07
WWC3	0.13	0.0199	0.14	0.0122	0.266	0.014
XK	2.971	0.0203	0.983	0.0178	2.164	0.0118
XYLB	-0.244	0.00185	-0.222	0.0046	-0.47	0.00171
ZBTB16	0.379	0.00394	0.28	0.0339	0.652	0.00309
ZBTB7B	0.356	0.0445	0.428	0.0152	0.781	0.000346
ZDHHC20-IT1	0.754	0.0124	0.661	0.028	1.471	0.00243
ZNF10	-0.293	0.0114	-0.429	0.000208	-0.722	0.000461
ZNF524	0.304	0.0483	0.479	0.00185	0.785	0.0022
ZNF682	-0.33	0.0245	-0.53	0.000293	-0.888	6.97e-06
ZNF711	-0.289	0.0184	-0.326	0.00842	-0.611	0.00353
ZNF750	0.338	0.0475	0.509	0.0029	0.848	0.00381
ZNF877P	1.23	0.0413	1.407	0.0217	2.361	0.0143
ZPR1P1	0.62	0.0266	0.592	0.0344	1.179	0.00102
ZXDC	0.175	0.00957	0.165	0.0146	0.338	0.000826
Based on the deseq, and filtered using IPA, genes that were expressed in all COVID-19 and AD datasets with an absolute expression of 0.0001 or greater and p<0.05 are presented in Suplemental Data 2. Expr. Is expression.
