# Supplementary material for: Recapitulation of pathophysiological features of AD in SARS-CoV-2-infected subjects
Source: eLife. 2023 Jul 7;12:e86333. doi: 10.7554/eLife.86333 (PMC10361716; doi:10.7554/eLife.86333)
Supplement: Supplementary file 1. — Numbers presented are the average per group and standard deviation PMI is postmortem interval (n = 4); OtD is onset to death. ABC is a multipoint measurement where A is a measure of amyloid β deposition, B is a measure of neurofibrillary degeneration based on the Braak score, and C is scored based on neuritic plaques outlined by the Consortium to Establish a Registry for Alzheimer’s Disease diagnosis (CERAD). [file elife-86333-supp1.xlsx]

## Sheet: Supplemental Table 1
Table 1. Demographics of Postmortem Cases
Characteristic/test		Control	AD	SRAS-CoV-2	AD+ SRAS-CoV-2
Age, years		76 ± 4.5	82.3 ± 13.3	78.6 ± 11.3	81.3 ± 10.1
Female sex, percent		50	50	50	50
PMI, hours		15.7 ± 6.7	26 ± 23.6	33.8 ± 35.6	29 ± 28
ABC
Amyloid		N/a	2.8 ± 0.5	N/a	2 ± 1.4
Braak and Brook		N/a	2.5 ± 0.6	N/a	2 ± 1.4
CERAD		N/a	1.8 ± 1.6	N/a	2 ± 1.4
SRAS-CoV-2 OtD, days		N/a	N/a	27 ± 19.2	32 ± 19.5
