# Supplementary material for: Recapitulation of pathophysiological features of AD in SARS-CoV-2-infected subjects
Source: eLife. 2023 Jul 7;12:e86333. doi: 10.7554/eLife.86333 (PMC10361716; doi:10.7554/eLife.86333)
Supplement: Supplementary file 2. — Symptoms are presented as a percentage of the group (n = 4); chemistry numbers are presented as the average per group and standard deviation, based on maximum values collected for single values and the minimum and maximum range collected in cells with two values. Bolded values are implicated as indicators of severe SARS-CoV-2 outcomes; ALP, alkaline phosphatase; ALT, alanine aminotransferase; AST, aspartate transferase; CRP, c-reactive protein; ESR, erythrocyte sedimentation; INR, international normalized ratio; LDH, lactate dehydrogenase; WBC, white blood count; BUN, blood urea nitrogen. [file elife-86333-supp2.xlsx]

## Sheet: Supplemental Table 2
Table 2. Blood Chemistry and Symptoms
	Control	AD	SARS-CoV-2	AD+SARS-CoV-2
Symptoms
Fever/ Chills	N/a	N/a	100	75
Ache/ Myalgia	N/a	N/a	50	25
Shortness of Breath	N/a	N/a	100	75
Encephalopathy/ Confusion	N/a	N/a	100	100
Impaired responsiveness/ Coma	N/a	N/a	100	75
Agitation	N/a	N/a	0	100
Anosmia	N/a	N/a	25	0
Chemistry
D-dimer	N/a	N/a	10.6 ± 6.4	12.9 ± 8.9
Ferritin	N/a	N/a	1887.8 ± 1186.5	1713.7 ± 2094.7
Proocalcitonin	N/a	N/a	12.4 ± 14.5	5.7 ± 7.9
ALP	N/a	N/a	136.3 ± 55.2	138.3 ± 106.6
ALT	N/a	N/a	71.0 ± 27.6	122.3 ± 168.0
AST	N/a	N/a	110.0 ± 38.2	116.5 ± 108.8
CRP	N/a	N/a	364.1 ± 96.7	223.4 ± 36.3
Calcium	N/a	N/a	7.1 ± 0.2 to 9.2 ± 0.5	7.7 ± 0.7 to 8.8 ± 0.6
Creatinine	N/a	N/a	3.6 ± 2.1	1.5 ± 0.6
ESR	N/a	N/a	66.0 ± 46.7	69.3 ± 17.0
Eosinophil	N/a	N/a	0 ± 0 to 0.3 ± 0.4	0.0 ± 0.0 to 0.2 ± 0.2
Fibrinogen	N/a	N/a	0.9 ±0.3	0.6 ± 0.0
IL-6	N/a	N/a	750.6 ± 1279.7	239.4 ± 152.2
INR	N/a	N/a	1.2 ± 0.2 to 1.9 ± 0.2	1.3 ± 0.2 to 1.8 ± 0.5
LDH	N/a	N/a	748.5 ± 98.0	698.0 ± 0.6
Lymphocyte	N/a	N/a	0.4 ± 0.4 to 1.5 ± 1.2	0.8 ± 0.8 to 1.2 ± 0.6
Monocyte	N/a	N/a	0.1 ± 0.1 to 0.8 ± 0.4	0.3 ± 0.3 to 0.8 ± 0.6
Neutrophil	N/a	N/a	5.0 ± 0.5 to 18.7 ± 9.8	5.7 ± 3.5 to 11.2 ± 6.0
Sodium	N/a	N/a	134.3 ± 7.4 to 154.5 ± 6.7	143.0 ± 8.5 to 159.3 ± 10.5
Tropinin	N/a	N/a	0.8 ± 1.4	1.3 ± 2.3
WBC	N/a	N/a	34.7 ± 16.7	13.7 ± 6.4
BUN	N/a	N/a	106.8 ± 33.7	55.7 ± 11.9
Glucose	N/a	N/a	106.5 ± 33.5 to 304.0 ± 73.3	123.3 ± 44.9 to 231.3 ± 60.7
Potassium	N/a	N/a	3.8 ± 0.5 to 6.2 ± 0.9	3.5 ± 0.6 to 4.7 ± 0.1
Albumin	N/a	N/a	1.5 ± 0.1	1.9 ± 0.1
Hemoglobin	N/a	N/a	8.0 ± 1.6	9.0 ± 2.3
Platelets	N/a	N/a	121.3 ± 78.1	273.8 ± 186.8
